# Supplementary material for: Exclusive and Combined Use of Statins and Aspirin and the Risk of Pancreatic Cancer: a Case-Control Study
Source: PubMed Central journal article supplement (PMC5638859; doi:10.1038/s41598-017-13430-z), 2017-10-12
Supplement: 41598_2017_13430_MOESM1_ESM.pdf [file 41598_2017_13430_MOESM1_ESM.pdf]

**Exclusive and Combined Use of Statins and Aspirin and the Risk of Pancreatic Cancer: a Case-Control Study R2: Supplementary Files**

*Livia Archibugi MD, Matteo Piciucchi MD, Serena Stigliano MD, Roberto Valente MD, Giulia Zerboni MD, Viola Barucca MD, Michele Milella MD, Patrick Maisonneuve Eng, Gianfranco Delle Fave MD, Gabriele Capurso MD PhD*

**Supplementary Table 1.** Full multivariable model for the association between aspirin, statins and PDAC

|                                   | <b>Multivariable analysis<br/>OR (95% CI)</b> | <b>P value</b> |
|-----------------------------------|-----------------------------------------------|----------------|
| Age                               | 1.01 (1.00-1.02)                              | 0.24           |
| Male gender                       | 0.86 (0.66-1.12)                              | 0.27           |
| 1 <sup>st</sup> degree FH of PDAC | 3.22 (1.82-5.70)                              | 0.0001         |
| BMI (mean ± Std.dev.)             | 1.05 (1.02-1.08)                              | 0.002          |
| History of diabetes               | 2.00 (1.36-2.92)                              | 0.0004         |
| Chronic pancreatitis              | 17.01 (3.78-76.57)                            | 0.0002         |
| Ever smoker                       | 1.87 (1.43-2.45)                              | <0.0001        |
| Aspirin use                       | 0.76 (0.54-1.07)                              | 0.12           |
| Statin use                        | 0.60 (0.43-0.84)                              | 0.003          |

FH: Family History, PDAC: Pancreatic Ductal AdenoCarcinoma, BMI: Body Mass Index, OR: Odds Ratio, CI: Confidence Interval

**Supplementary Table 2.** Exclusive use of aspirin and statin and their interaction among pancreatic cancer cases and controls

|                                  | <b>Cases<br/>(408)</b> | <b>Controls<br/>(816)</b> | <b>Age and sex<br/>adjusted<sup>1</sup><br/>OR (95% CI)</b> | <b>P value</b> | <b>Multivariable<br/>analysis<sup>2</sup><br/>OR (95% CI)</b> | <b>P value</b> |
|----------------------------------|------------------------|---------------------------|-------------------------------------------------------------|----------------|---------------------------------------------------------------|----------------|
| <b>Exclusive or combined use</b> |                        |                           |                                                             |                |                                                               |                |
| Neither aspirin nor statins      | 295 (72.3%)            | 518 (63.5%)               | 1.00                                                        |                | 1.00                                                          |                |
| Aspirin only                     | 39 ( 9.6%)             | 95 (11.6%)                | 0.67 (0.45-1.02)                                            | 0.06           | 0.64 (0.40-1.01)                                              | 0.06           |
| Statins only                     | 35 ( 8.6%)             | 107 (13.1%)               | 0.54 (0.36-0.82)                                            | 0.004          | 0.51 (0.32-0.80)                                              | 0.004          |
| Interaction                      | 39 ( 9.6%)             | 96 (11.8%)                | 1.84 (0.94-3.60)                                            | 0.08           | 1.68 (0.80-3.54)                                              | 0.17           |

OR: Odds Ratio, CI: Confidence Interval

<sup>1</sup>Odds Ratios adjusted for age (5-year age groups) and gender

<sup>2</sup>Odds ratios adjusted for age (5-year age groups), sex, body mass index (continuous scale), family history of pancreatic cancer (first and second degree relatives), history of chronic pancreatitis, history of diabetes > 1 year, smoking and drinking habits.
